# Supplementary material for: In Silico Structural and Functional Characterization of HtrA Proteins of Leptospira spp.: Possible Implications in Pathogenesis
Source: MDPI journal article supplement (doi:10.3390/tropicalmed5040179), 2020-11-28
Supplement: s1 [file s1]

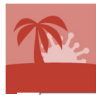

|                          | <i>L. interrogans</i> | <i>L. noguchii</i> | <i>L. kirschneri</i> | <i>L. alstonii</i> | <i>L. weilii</i> | <i>L. alexanderi</i> | <i>L. borgpetersenii</i> | <i>L. santarosai</i> | <i>L. kmetyi</i> | <i>L. fainei</i> | <i>L. broomii</i> | <i>L. wolffii</i> | <i>L. licerasiae</i> | <i>L. inadai</i> | <i>L. wolbachii</i> | <i>L. yamagatae</i> | <i>L. vanthielii</i> | <i>L. terpstuae</i> | <i>L. meyeri</i> | <i>L. biflexa</i> |
|--------------------------|-----------------------|--------------------|----------------------|--------------------|------------------|----------------------|--------------------------|----------------------|------------------|------------------|-------------------|-------------------|----------------------|------------------|---------------------|---------------------|----------------------|---------------------|------------------|-------------------|
| <i>L. interrogans</i>    |                       |                    |                      |                    |                  |                      |                          |                      |                  |                  |                   |                   |                      |                  |                     |                     |                      |                     |                  |                   |
| <i>L. noguchii</i>       | 96                    |                    |                      |                    |                  |                      |                          |                      |                  |                  |                   |                   |                      |                  |                     |                     |                      |                     |                  |                   |
| <i>L. kirschneri</i>     | 97                    | 96                 |                      |                    |                  |                      |                          |                      |                  |                  |                   |                   |                      |                  |                     |                     |                      |                     |                  |                   |
| <i>L. alstonii</i>       | 81                    | 80                 | 81                   |                    |                  |                      |                          |                      |                  |                  |                   |                   |                      |                  |                     |                     |                      |                     |                  |                   |
| <i>L. weilii</i>         | 82                    | 81                 | 82                   | 82                 |                  |                      |                          |                      |                  |                  |                   |                   |                      |                  |                     |                     |                      |                     |                  |                   |
| <i>L. alexanderi</i>     | 81                    | 80                 | 81                   | 83                 | 97               |                      |                          |                      |                  |                  |                   |                   |                      |                  |                     |                     |                      |                     |                  |                   |
| <i>L. borgpetersenii</i> | 81                    | 80                 | 82                   | 82                 | 92               | 94                   |                          |                      |                  |                  |                   |                   |                      |                  |                     |                     |                      |                     |                  |                   |
| <i>L. santarosai</i>     | 81                    | 81                 | 81                   | 82                 | 90               | 90                   | 89                       |                      |                  |                  |                   |                   |                      |                  |                     |                     |                      |                     |                  |                   |
| <i>L. kmetyi</i>         | 78                    | 76                 | 78                   | 78                 | 79               | 79                   | 78                       | 76                   |                  |                  |                   |                   |                      |                  |                     |                     |                      |                     |                  |                   |
| <i>L. fainei</i>         | 48                    | 47                 | 48                   | 48                 | 48               | 48                   | 46                       | 47                   | 48               |                  |                   |                   |                      |                  |                     |                     |                      |                     |                  |                   |
| <i>L. broomii</i>        | 47                    | 46                 | 47                   | 46                 | 47               | 47                   | 45                       | 45                   | 46               | 92               |                   |                   |                      |                  |                     |                     |                      |                     |                  |                   |
| <i>L. wolffii</i>        | 49                    | 49                 | 48                   | 48                 | 47               | 47                   | 45                       | 47                   | 47               | 68               | 69                |                   |                      |                  |                     |                     |                      |                     |                  |                   |
| <i>L. licerasiae</i>     | 46                    | 47                 | 46                   | 46                 | 48               | 48                   | 47                       | 46                   | 47               | 69               | 69                | 80                |                      |                  |                     |                     |                      |                     |                  |                   |
| <i>L. inadai</i>         | 46                    | 47                 | 46                   | 46                 | 47               | 47                   | 45                       | 46                   | 46               | 92               | 94                | 69                | 70                   |                  |                     |                     |                      |                     |                  |                   |
| <i>L. wolbachii</i>      | 34                    | 34                 | 34                   | 35                 | 34               | 34                   | 34                       | 35                   | 35               | 37               | 36                | 36                | 35                   | 37               |                     |                     |                      |                     |                  |                   |
| <i>L. yamagatae</i>      | 35                    | 35                 | 35                   | 33                 | 35               | 35                   | 35                       | 36                   | 33               | 35               | 35                | 35                | 34                   | 37               | 80                  |                     |                      |                     |                  |                   |
| <i>L. vanthielii</i>     | 33                    | 33                 | 34                   | 34                 | 34               | 33                   | 33                       | 35                   | 35               | 37               | 36                | 36                | 33                   | 36               | 98                  | 79                  |                      |                     |                  |                   |
| <i>L. terpstuae</i>      | 33                    | 33                 | 33                   | 33                 | 34               | 34                   | 34                       | 35                   | 34               | 36               | 36                | 36                | 34                   | 37               | 93                  | 80                  | 93                   |                     |                  |                   |
| <i>L. meyeri</i>         | 34                    | 34                 | 34                   | 35                 | 35               | 35                   | 34                       | 34                   | 33               | 37               | 36                | 35                | 33                   | 36               | 92                  | 77                  | 93                   | 90                  |                  |                   |
| <i>L. biflexa</i>        | 36                    | 36                 | 36                   | 33                 | 35               | 35                   | 35                       | 35                   | 35               | 33               | 35                | 37                | 34                   | 35               | 81                  | 87                  | 79                   | 80                  | 78               |                   |

**Figure S1.** Amino acid sequence identities of LIC1111 from 20 different *Leptospira* strains. The image was generated comparing the sequence of the protein encoded by LIC11112 from *L. interrogans* serovar Copenhageni with other 20 species (pathogenic, intermediate and saprophytic). Similarity is shown in red above 80%, in yellow between 50% and 80% and in green below 50%.

|                          | <i>L. interrogans</i> | <i>L. noguchii</i> | <i>L. kirschneri</i> | <i>L. alstonii</i> | <i>L. weilii</i> | <i>L. alexanderi</i> | <i>L. borgpetersenii</i> | <i>L. santarosai</i> | <i>L. kmetyi</i> | <i>L. fainei</i> | <i>L. broomii</i> | <i>L. wolffii</i> | <i>L. licerasiae</i> | <i>L. inadai</i> | <i>L. wolbachii</i> | <i>L. yamagatae</i> | <i>L. vanthielii</i> | <i>L. terpstuae</i> | <i>L. meyeri</i> | <i>L. biflexa</i> |
|--------------------------|-----------------------|--------------------|----------------------|--------------------|------------------|----------------------|--------------------------|----------------------|------------------|------------------|-------------------|-------------------|----------------------|------------------|---------------------|---------------------|----------------------|---------------------|------------------|-------------------|
| <i>L. interrogans</i>    |                       |                    |                      |                    |                  |                      |                          |                      |                  |                  |                   |                   |                      |                  |                     |                     |                      |                     |                  |                   |
| <i>L. noguchii</i>       | 98                    |                    |                      |                    |                  |                      |                          |                      |                  |                  |                   |                   |                      |                  |                     |                     |                      |                     |                  |                   |
| <i>L. kirschneri</i>     | 99                    | 98                 |                      |                    |                  |                      |                          |                      |                  |                  |                   |                   |                      |                  |                     |                     |                      |                     |                  |                   |
| <i>L. alstonii</i>       | 91                    | 93                 | 92                   |                    |                  |                      |                          |                      |                  |                  |                   |                   |                      |                  |                     |                     |                      |                     |                  |                   |
| <i>L. weilii</i>         | 92                    | 93                 | 92                   | 96                 |                  |                      |                          |                      |                  |                  |                   |                   |                      |                  |                     |                     |                      |                     |                  |                   |
| <i>L. alexanderi</i>     | 88                    | 89                 | 88                   | 91                 | 90               |                      |                          |                      |                  |                  |                   |                   |                      |                  |                     |                     |                      |                     |                  |                   |
| <i>L. borgpetersenii</i> | 88                    | 89                 | 89                   | 90                 | 89               | 95                   |                          |                      |                  |                  |                   |                   |                      |                  |                     |                     |                      |                     |                  |                   |
| <i>L. santarosai</i>     | 88                    | 89                 | 89                   | 91                 | 89               | 93                   | 93                       |                      |                  |                  |                   |                   |                      |                  |                     |                     |                      |                     |                  |                   |
| <i>L. kmetyi</i>         | 91                    | 92                 | 91                   | 94                 | 92               | 92                   | 92                       | 92                   |                  |                  |                   |                   |                      |                  |                     |                     |                      |                     |                  |                   |
| <i>L. fainei</i>         | 78                    | 79                 | 78                   | 78                 | 78               | 77                   | 78                       | 78                   | 80               |                  |                   |                   |                      |                  |                     |                     |                      |                     |                  |                   |
| <i>L. broomii</i>        | 78                    | 79                 | 78                   | 78                 | 78               | 76                   | 78                       | 77                   | 80               | 99               |                   |                   |                      |                  |                     |                     |                      |                     |                  |                   |
| <i>L. wolffii</i>        | 77                    | 78                 | 77                   | 77                 | 78               | 75                   | 76                       | 75                   | 78               | 87               | 87                |                   |                      |                  |                     |                     |                      |                     |                  |                   |
| <i>L. licerasiae</i>     | 76                    | 78                 | 77                   | 75                 | 78               | 73                   | 75                       | 73                   | 76               | 84               | 84                | 90                |                      |                  |                     |                     |                      |                     |                  |                   |
| <i>L. inadai</i>         | 77                    | 79                 | 78                   | 78                 | 77               | 76                   | 77                       | 77                   | 79               | 99               | 99                | 86                | 84                   |                  |                     |                     |                      |                     |                  |                   |
| <i>L. wolbachii</i>      | 61                    | 60                 | 61                   | 61                 | 61               | 60                   | 60                       | 60                   | 61               | 60               | 60                | 60                | 62                   | 60               |                     |                     |                      |                     |                  |                   |
| <i>L. yamagatae</i>      | 61                    | 60                 | 60                   | 61                 | 61               | 60                   | 60                       | 60                   | 61               | 60               | 60                | 59                | 61                   | 60               | 95                  |                     |                      |                     |                  |                   |
| <i>L. vanthielii</i>     | 61                    | 60                 | 61                   | 61                 | 61               | 60                   | 60                       | 60                   | 61               | 60               | 60                | 60                | 62                   | 60               | 100                 | 95                  |                      |                     |                  |                   |
| <i>L. terpstuae</i>      | 61                    | 60                 | 61                   | 61                 | 61               | 60                   | 60                       | 60                   | 61               | 60               | 60                | 60                | 62                   | 60               | 99                  | 95                  | 99                   |                     |                  |                   |
| <i>L. meyeri</i>         | 60                    | 60                 | 60                   | 61                 | 60               | 60                   | 60                       | 60                   | 60               | 59               | 59                | 59                | 61                   | 59               | 99                  | 95                  | 99                   | 99                  |                  |                   |
| <i>L. biflexa</i>        | 60                    | 60                 | 60                   | 60                 | 61               | 60                   | 60                       | 60                   | 60               | 59               | 59                | 59                | 61                   | 59               | 96                  | 97                  | 96                   | 96                  | 96               |                   |

**Figure S2.** Amino acid sequence identities of LIC11037 from 20 different *Leptospira* strains. The image was generated comparing the sequence of the protein encoded by LIC11112 from *L. interrogans* serovar Copenhageni with other 20 species (pathogenic, intermediate and saprophytic). Similarity is shown in red above 80%, in yellow between 50% and 80% and in green below 50%.

|                          | <i>L. interrogans</i> | <i>L. noguchii</i> | <i>L. kirshneri</i> | <i>L. alstonii</i> | <i>L. weilii</i> | <i>L. alexanderi</i> | <i>L. borgpetersenii</i> | <i>L. santarosai</i> | <i>L. kmetyi</i> | <i>L. fainei</i> | <i>L. broomii</i> | <i>L. wolffii</i> | <i>L. licherasiae</i> | <i>L. inadai</i> | <i>L. wolbachii</i> | <i>L. yanagawae</i> | <i>L. vanthiellii</i> | <i>L. terpstae</i> | <i>L. meyeri</i> | <i>L. biflexa</i> |
|--------------------------|-----------------------|--------------------|---------------------|--------------------|------------------|----------------------|--------------------------|----------------------|------------------|------------------|-------------------|-------------------|-----------------------|------------------|---------------------|---------------------|-----------------------|--------------------|------------------|-------------------|
| <i>L. interrogans</i>    |                       |                    |                     |                    |                  |                      |                          |                      |                  |                  |                   |                   |                       |                  |                     |                     |                       |                    |                  |                   |
| <i>L. noguchii</i>       | 91                    |                    |                     |                    |                  |                      |                          |                      |                  |                  |                   |                   |                       |                  |                     |                     |                       |                    |                  |                   |
| <i>L. kirshneri</i>      | 93                    | 93                 |                     |                    |                  |                      |                          |                      |                  |                  |                   |                   |                       |                  |                     |                     |                       |                    |                  |                   |
| <i>L. alstonii</i>       | 83                    | 84                 | 84                  |                    |                  |                      |                          |                      |                  |                  |                   |                   |                       |                  |                     |                     |                       |                    |                  |                   |
| <i>L. weilii</i>         | 83                    | 83                 | 85                  | 92                 |                  |                      |                          |                      |                  |                  |                   |                   |                       |                  |                     |                     |                       |                    |                  |                   |
| <i>L. alexanderi</i>     | 83                    | 84                 | 84                  | 89                 | 96               |                      |                          |                      |                  |                  |                   |                   |                       |                  |                     |                     |                       |                    |                  |                   |
| <i>L. borgpetersenii</i> | 84                    | 84                 | 84                  | 89                 | 92               | 94                   |                          |                      |                  |                  |                   |                   |                       |                  |                     |                     |                       |                    |                  |                   |
| <i>L. santarosai</i>     | 79                    | 83                 | 85                  | 87                 | 86               | 86                   | 85                       |                      |                  |                  |                   |                   |                       |                  |                     |                     |                       |                    |                  |                   |
| <i>L. kmetyi</i>         | 81                    | 81                 | 82                  | 82                 | 82               | 82                   | 82                       | 77                   |                  |                  |                   |                   |                       |                  |                     |                     |                       |                    |                  |                   |
| <i>L. fainei</i>         | 57                    | 56                 | 58                  | 56                 | 55               | 55                   | 58                       | 57                   | 59               |                  |                   |                   |                       |                  |                     |                     |                       |                    |                  |                   |
| <i>L. broomii</i>        | 54                    | 56                 | 53                  | 53                 | 54               | 54                   | 54                       | 56                   | 57               | 93               |                   |                   |                       |                  |                     |                     |                       |                    |                  |                   |
| <i>L. wolffii</i>        | 55                    | 56                 | 56                  | 55                 | 57               | 55                   | 57                       | 57                   | 58               | 69               | 70                |                   |                       |                  |                     |                     |                       |                    |                  |                   |
| <i>L. licherasiae</i>    | 54                    | 55                 | 56                  | 56                 | 53               | 54                   | 56                       | 55                   | 54               | 65               | 64                | 73                |                       |                  |                     |                     |                       |                    |                  |                   |
| <i>L. inadai</i>         | 59                    | 56                 | 54                  | 54                 | 54               | 53                   | 53                       | 56                   | 55               | 92               | 95                | 72                | 63                    |                  |                     |                     |                       |                    |                  |                   |
| <i>L. wolbachii</i>      | 37                    | 37                 | 37                  | 37                 | 37               | 37                   | 36                       | 37                   | 37               | 37               | 38                | 39                | 38                    | 38               |                     |                     |                       |                    |                  |                   |
| <i>L. yanagawae</i>      | 37                    | 36                 | 36                  | 35                 | 37               | 37                   | 37                       | 37                   | 36               | 38               | 38                | 38                | 38                    | 37               | 76                  |                     |                       |                    |                  |                   |
| <i>L. vanthiellii</i>    | 37                    | 36                 | 36                  | 37                 | 36               | 36                   | 37                       | 37                   | 36               | 38               | 38                | 38                | 38                    | 38               | 95                  | 77                  |                       |                    |                  |                   |
| <i>L. terpstae</i>       | 38                    | 37                 | 37                  | 37                 | 37               | 37                   | 37                       | 38                   | 36               | 37               | 39                | 39                | 38                    | 39               | 91                  | 76                  | 90                    |                    |                  |                   |
| <i>L. meyeri</i>         | 38                    | 37                 | 37                  | 37                 | 37               | 37                   | 37                       | 37                   | 37               | 38               | 39                | 39                | 37                    | 39               | 86                  | 75                  | 86                    | 88                 |                  |                   |
| <i>L. biflexa</i>        | 37                    | 36                 | 36                  | 35                 | 36               | 36                   | 35                       | 36                   | 36               | 37               | 38                | 38                | 38                    | 38               | 74                  | 80                  | 75                    | 74                 | 73               |                   |

**Figure S3.** Amino acid sequence identities of LIC20144 from 20 different *Leptospira* strains. The image was generated comparing the sequence of the protein encoded by LIC11112 from *L. interrogans* serovar Copenhageni with other 20 species (pathogenic, intermediate and saprophytic). Similarity is shown in red above 80%, in yellow between 50% and 80% and in green below 50%.

|                              |                   |               |              |
|------------------------------|-------------------|---------------|--------------|
| <b><i>L. interrogans</i></b> | LIGNKRILTNAHVVSN  | AHDCDLAVLEAEN | NPGNSGGPAIQD |
| <i>L. noguchii</i>           | LIGNKRILTNAHVVSN  | AHDCDLAVLEAEN | NPGNSGGPAIQD |
| <i>L. kirshneri</i>          | LIGNKRILTNAHVVSN  | AHDCDLAVLEAEN | NPGNSGGPAIQD |
| <i>L. alstonii</i>           | LIGNKRILTNAHVVSN  | AHDCDLAVLEAES | NPGNSGGPAIQD |
| <i>L. weilii</i>             | LIGNKRILTNAHVVSN  | AHDCDLAVLEAES | NPGNSGGPAIQD |
| <i>L. alexanderi</i>         | LIGNKRILTNAHVVSN  | AHDCDLAVLEAES | NPGNSGGPAIQD |
| <i>L. borgpetersenii</i>     | LIGNKKILTNAHVVSN  | AHDCDLAVLEAES | NPGNSGGPAIQD |
| <i>L. santarosai</i>         | LIGNKRILTNAHVVSN  | AHDCDLAVLEAES | NPGNSGGPAIQD |
| <i>L. kmetyi</i>             | LIGNKRILTNAHVVSN  | AHDCDLAVLEAES | NPGNSGGPAIQD |
| <i>L. fainei</i>             | LIGKKRILTNAHVVSN  | AHDCDLAILEAED | NPGNSGGPAIQG |
| <i>L. broomii</i>            | LIGKKRILTNAHVVSN  | AHDCDLAILEAED | NPGNSGGPAIQD |
| <i>L. wolffii</i>            | LIGNKRILTNAHVVISN | AHDCDLAVLEAED | NPGNSGGPAIQN |
| <i>L. licherasiae</i>        | LIGNKRILTNAHVVISN | AHDCDLAVLEAED | NPGNSGGPAIQN |
| <i>L. inadai</i>             | LIGKKRILTNAHVVSN  | AHDCDLALLEAED | NPGNSGGPAIQD |
| <i>L. wolbachii</i>          | LISKNRILTNAHVVSN  | AHDCDLALLEVSD | NPGNSGGPALQN |
| <i>L. yanagawae</i>          | IISKNRILTNAHVVSN  | AHDCDLAILEVPD | NPGNSGGPALQD |
| <i>L. vanthiellii</i>        | LISKNRILTNAHVVSN  | AHDCDLALLEVSD | NPGNSGGPALQN |
| <i>L. terpstae</i>           | LISKNRILTNAHVVSN  | AHDCDLALLEVSD | NPGNSGGPALQN |
| <i>L. meyeri</i>             | LISKNRILTNAHVVSN  | AHDCDLALLEVSD | NPGNSGGPALQE |
| <i>L. biflexa</i>            | IIAKNRILTNAHVVSN  | AHDCDLAILEVPD | NPGNSGGPALQN |

**Figure S4.** Alignment of the LIC20143 of *L. interrogans* serovar Copenhageni with other *Leptospira* species. Alignment was done using the PROMALS3D tool, which aligns the sequences considering the amino acid sequence and protein domains. The amino acids Histidine (H), Aspartic acid (D) and Serine (S)—highlighted—are present in all 20 species of *Leptospira* selected in this study and represent the residues essential to the catalytic activity.

|                              |                              |                          |                              |
|------------------------------|------------------------------|--------------------------|------------------------------|
| <b><i>L. interrogans</i></b> | ISGNRILTNA <b>H</b> VVSNSY   | YLGFD <b>C</b> DLAILKVEE | VNANIIPGY <b>S</b> GGPAIQNGR |
| <i>L. noguchii</i>           | ISGNRILTNA <b>H</b> VVSNSY   | YLGFD <b>C</b> DLAILKVEE | VNANIIPGY <b>S</b> GGPAIQNGK |
| <i>L. kirshneri</i>          | ISGNRILTNA <b>H</b> VVSNSY   | YLGFD <b>C</b> DLAILKVEE | VNANIIPGY <b>S</b> GGPAIQNGR |
| <i>L. alstonii</i>           | ISGNRILTNA <b>H</b> VVSNSGY  | YLGFD <b>C</b> DLAILKVEE | VNANIIPGY <b>S</b> GGPAIQNGK |
| <i>L. weillii</i>            | ISGNRILTNA <b>H</b> VVSNSGY  | YLGFD <b>C</b> DLAILKVEE | VNANIIPGY <b>S</b> GGPAIQNGK |
| <i>L. alexanderi</i>         | ISGNRILTNA <b>H</b> VVISNSY  | FLGFD <b>C</b> DLAILKVEE | VNANIIPGY <b>S</b> GGPAIQNGK |
| <i>L. borgpetersenii</i>     | ISGNRILTNA <b>H</b> VVSNSNY  | YLGFD <b>C</b> DLAILKVEE | VNANIIPGY <b>S</b> GGPAIQSGK |
| <i>L. santarosai</i>         | ISGNRILTNA <b>H</b> VVSDSSY  | YLGFD <b>C</b> DLAILKVEE | VNANIIPGY <b>S</b> GGPAIQNGK |
| <i>L. kmetyi</i>             | IAGNRILTNA <b>H</b> VVSNSGY  | YLGFD <b>C</b> DLAILKVEE | VNANIIPGY <b>S</b> GGPAIQNGK |
| <i>L. fainei</i>             | IQGNRILTNA <b>H</b> VVAESKF  | FLGFD <b>C</b> DLALLKVED | VTANILPGY <b>S</b> GGPAIQNGK |
| <i>L. broomii</i>            | IQGNRILTNA <b>H</b> VVAESKF  | FLGFD <b>C</b> DLALLKVED | VTANILPGY <b>S</b> GGPAIQNGQ |
| <i>L. wolffii</i>            | VAGNRILTNA <b>H</b> VISESKY  | FLGFD <b>C</b> DLALIKVED | VGANILPGY <b>S</b> GGPAIQNGK |
| <i>L. licherasiae</i>        | IAGNRILTNA <b>H</b> VISESKY  | FIGFD <b>C</b> DLALISVED | VGANILPGY <b>S</b> GGPAIQNGK |
| <i>L. inadai</i>             | IQGNRILTNA <b>H</b> VVAESKF  | FLGFD <b>C</b> DLALLKVAD | VTANILPGY <b>S</b> GGPAVQNGQ |
| <i>L. wolbachii</i>          | LPNQITILTNA <b>H</b> VVRDAKR | FIGYD <b>C</b> DLALLQVAD | ITANIQPGN <b>S</b> GGPAVQNGK |
| <i>L. yanagawae</i>          | LPNQITILTNA <b>H</b> VVRDAKR | YIGYD <b>C</b> DLALLQVND | ISANIQPGN <b>S</b> GGPAVQNGK |
| <i>L. vanthielli</i>         | LPNQITILTNA <b>H</b> VVRDAKR | FIGYD <b>C</b> DLALLQVTD | ITANIQPGN <b>S</b> GGPAVQNGK |
| <i>L. terpstae</i>           | LSNQITILTNA <b>H</b> VVRDAKR | FIGYD <b>C</b> DLALLQVTD | ITANIQPGN <b>S</b> GGPAVQNGK |
| <i>L. meyeri</i>             | LPNQITILTNA <b>H</b> VVRDAKR | YIGYD <b>C</b> DLALLQVND | INANIQPGN <b>S</b> GGPAVQNGK |
| <i>L. biflexa</i>            | LPNQITILTNA <b>H</b> VVRDAKR | FIGYD <b>C</b> DLALLQVND | ISANIQPGN <b>S</b> GGPAVQNGK |

**Figure S5.** Alignment of the LIC1112 of *L. interrogans* serovar Copenhageni with other *Leptospira* species. Alignment was done using the PROMALS3D tool, which aligns the sequences considering the amino acid sequence and protein domains. The amino acids Histidine (H), Aspartic acid (D) and Serine (S)—highlighted—are present in all 20 species of *Leptospira* selected in this study and represent the residues essential to the catalytic activity.

|                              |                                   |                        |                       |
|------------------------------|-----------------------------------|------------------------|-----------------------|
| <b><i>L. interrogans</i></b> | VHEKGYIVTNY <b>H</b> VIED         | HERA <b>D</b> IALLKIRE | NPGS <b>S</b> GGPLLNI |
| <i>L. noguchii</i>           | VHEKGYIVTNY <b>H</b> VIED         | HERA <b>D</b> IALLKIRE | NPGS <b>S</b> GGPLLNI |
| <i>L. kirshneri</i>          | VHEKGYIVTNY <b>H</b> VIED         | HERA <b>D</b> IALLKIRE | NPGS <b>S</b> GGPLLNI |
| <i>L. alstonii</i>           | VHEKGYIVTNY <b>H</b> VIEG         | HERA <b>D</b> IALLKIRE | NPGS <b>S</b> GGPLLNI |
| <i>L. weilii</i>             | VHEKGYIVTNY <b>H</b> VIEG         | HERA <b>D</b> IALLKIRE | NPGS <b>S</b> GGPLLNI |
| <i>L. alexanderi</i>         | VHEKGYIVTNY <b>H</b> VIEG         | HERA <b>D</b> IALLKIRE | NPGS <b>S</b> GGPLLNI |
| <i>L. borgpetersenii</i>     | VHEKGYIVTNY <b>H</b> VIEG         | HERA <b>D</b> IALLKIRE | NPGS <b>S</b> GGPLLNI |
| <i>L. santarosai</i>         | VHEKGYIVTNY <b>H</b> VIEG         | HERA <b>D</b> IALLKIRE | NPGS <b>S</b> GGPLLNI |
| <i>L. kmetyi</i>             | VHEKGYIVTNY <b>H</b> VIEG         | HERA <b>D</b> IALLKIRE | NPGS <b>S</b> GGPLLNI |
| <i>L. fainei</i>             | IHEKGYIVTN <b>F</b> <b>H</b> VIEG | HERA <b>D</b> ISLLKIRE | NPGS <b>S</b> GGPLLNI |
| <i>L. broomii</i>            | IHEKGYIVTN <b>F</b> <b>H</b> VIEG | HERA <b>D</b> ISLLKIRE | NPGS <b>S</b> GGPLLNI |
| <i>L. wolffii</i>            | IHEKGYIVTN <b>F</b> <b>H</b> VIQD | HERA <b>D</b> IALLKIKE | NPGS <b>S</b> GGPLLNI |
| <i>L. licerasiae</i>         | IHEKGYVVTN <b>F</b> <b>H</b> VISD | HERA <b>D</b> IALLKIKE | NPGS <b>S</b> GGPLLNI |
| <i>L. inadai</i>             | IHEKGYIATN <b>F</b> <b>H</b> VIEG | HERA <b>D</b> ISLLKIRE | NPGS <b>S</b> GGPLLNI |
| <i>L. wolbachii</i>          | IDERGFVVTNY <b>H</b> VIKN         | HERA <b>D</b> IALLKIPS | NPGS <b>S</b> GGPLLNI |
| <i>L. yanagawe</i>           | IDERGFVVTNY <b>H</b> VIKN         | HERA <b>D</b> IALLKIPS | NPGS <b>S</b> GGPLLNI |
| <i>L. vanthiellii</i>        | –                                 | HERA <b>D</b> IALLKIPS | NPGS <b>S</b> GGPLLNI |
| <i>L. terpstrae</i>          | IDERGFVVTNY <b>H</b> VIKN         | HERA <b>D</b> IALLKIPS | NPGS <b>S</b> GGPLLNI |
| <i>L. meyeri</i>             | IDERGFVVTNY <b>H</b> VIKN         | HERA <b>D</b> IALLKIPS | NPGS <b>S</b> GGPLLNI |
| <i>L. biflexa</i>            | IDERGFVVTNY <b>H</b> VIKN         | HERA <b>D</b> IALLKIPS | NPGS <b>S</b> GGPLLNI |

**Figure S6.** Alignment of the LIC11037 of *L. interrogans* serovar Copenhageni with other *Leptospira* species. Alignment was done using the PROMALS3D tool, which aligns the sequences considering the amino acid sequence and protein domains. The amino acids Histidine (H), Aspartic acid (D) and Serine (S)—highlighted—are present in all 20 species of *Leptospira*, except the Histidine that it is not present in *L. vanthiellii*, selected in this study and represent the residues essential to the catalytic activity.

**Table S1.** NCBI Accession IDs of all CDS for LIC11111, LIC11112, LIC20143, LIC20144 and LIC11037. They are displayed as follows: in red the pathogenic strains, in blue the intermediate ones and in green the saprophyte. All CDS were retrieved from the NCBI database through the Basic Local Alignment Search Tool (BLASTp).

| NCBI Accession I.D.      |                |                |                |                |                |
|--------------------------|----------------|----------------|----------------|----------------|----------------|
|                          | LIC11111       | LIC11112       | LIC20143       | LIC20144       | LIC11037       |
| <i>L. interrogans</i>    | WP_000675215.1 | WP_000039575.1 | WP_000125234.1 | WP_000944569.1 | WP_001976240.1 |
| <i>L. kirschneri</i>     | WP_004765384.1 | WP_004765506.1 | WP_082293370.1 | WP_004757632.1 | EKO60201.1     |
| <i>L. noguchii</i>       | WP_017214502.1 | WP_061247727.1 | WP_004452497.1 | WP_004449692.1 | WP_002245775.1 |
| <i>L. alstonii</i>       | WP_020774559.1 | WP_020774560.1 | WP_061248069.1 | WP_020772440.1 | WP_020773847.1 |
| <i>L. weilii</i>         | WP_061222824.1 | WP_003008403.1 | WP_061222378.1 | WP_061222350.1 | WP_002996538.1 |
| <i>L. alexanderi</i>     | WP_078128092.1 | WP_010578769.1 | WP_078128700.1 | WP_078128701.1 | WP_078129293.1 |
| <i>L. borgpetersenii</i> | EMO64919.1     | EMO65007.1     | WP_026054861.1 | WP_002732170.1 | EMO62864.1     |
| <i>L. santarosai</i>     | WP_004478972.1 | WP_004491925.1 | WP_076637811.1 | WP_046943593.1 | WP_016753804.1 |
| <i>L. kmetyi</i>         | WP_123179212.1 | WP_100736899.1 | WP_100756608.1 | WP_123180574.1 | WP_040913868.1 |
| <i>L. fainei</i>         | WP_016549290.1 | WP_016549246.1 | WP_016551179.1 | WP_016551249.1 | WP_016547636.1 |
| <i>L. broomii</i>        | WP_010570309.1 | WP_010570308.1 | WP_010568511.1 | WP_010568510.1 | WP_010570471.1 |
| <i>L. wolffii</i>        | WP_016544738.1 | WP_01654468.1  | WP_100758755.1 | WP_135701288.1 | WP_0165440.1   |
| <i>L. licerasiae</i>     | WP_008591953.1 | WP_008592017.1 | WP_008589276.1 | WP_135667780.1 | WP_008595422.1 |
| <i>L. inadai</i>         | WP_010411362.1 | WP_010411360.1 | WP_010409673.1 | WP_010409676.1 | WP_010411939.1 |
| <i>L. wolbachii</i>      | WP_015681858.1 | WP_015680886.1 | WP_015682936.1 | WP_015682854.1 | EOQ97072.1     |
| <i>L. yanagawe</i>       | WP_015677123.1 | WP_039928164.1 | WP_039929592.1 | WP_015679341.1 | WP_015678530.1 |
| <i>L. biflexa</i>        | WP_012390123.1 | WP_012390124.1 | WP_041770204.1 | WP_012476598.1 | WP_012387918.1 |
| <i>L. vanthiellii</i>    | WP_002988486.1 | WP_002988746.1 | WP_002980682.1 | WP_002980637.1 | EMY68206.1     |
| <i>L. terpstrae</i>      | WP_039937265.1 | WP_002972837.1 | WP_002975534.1 | WP_002975543.1 | WP_002973171.1 |
| <i>L. meyeri</i>         | WP_004786397.1 | WP_020776352.1 | WP_020777264.1 | WP_004788280.1 | EKJ86609.1     |

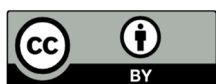

© 2020 by the authors. Licensee MDPI, Basel, Switzerland. This article is an open access article distributed under the terms and conditions of the Creative Commons Attribution (CC BY) license (<http://creativecommons.org/licenses/by/4.0/>).
